# Supplementary material for: Biological significance of KRAS mutant allele expression in ovarian endometriosis
Source: PubMed Central journal article supplement — Cancer Sci. 2021 Mar 30;112(5):2020–32. doi: 10.1111/cas.14871 (PMC8088964; doi:10.1111/cas.14871), 2021-03-30
Supplement: CAS-112-2020-s001.pdf [file CAS-112-2020-s001.pdf]

## Supporting Information

### Biological significance of *KRAS* mutant allele expression in ovarian endometriosis

Nozomi Yachida<sup>1</sup>, Kosuke Yoshihara<sup>1</sup>, Kazuaki Suda<sup>1</sup>, Hirofumi Nakaoka<sup>2,3</sup>, Haruka Ueda<sup>1</sup>, Kentaro Sugino<sup>1</sup>, Manako Yamaguchi<sup>1</sup>, Yutaro Mori<sup>1</sup>, Kaoru Yamawaki<sup>1</sup>, Ryo Tamura<sup>1</sup>, Tatsuya Ishiguro<sup>1</sup>, Hiroaki Kase<sup>4</sup>, Teiichi Motoyama<sup>5</sup>, Takayuki Enomoto<sup>1</sup>

1. Department of Obstetrics and Gynecology, Niigata University Graduate School of Medical and Dental Sciences, Niigata 951-8510, Japan
2. Human Genetics Laboratory, National Institute of Genetics, Mishima 411-8540, Japan
3. Department of Cancer Genome Research, Sasaki Institute, Sasaki Foundation, Chiyoda-ku 101-0062, Japan
4. Department of Obstetrics and Gynecology, Nagaoka Chuo General Hospital, Nagaoka, 940-8653, Japan
5. Department of Molecular and Diagnostic Pathology, Niigata University Graduate School of Medical and Dental Sciences, Niigata 951-8510, Japan

Table S1. The proportion of *KRAS* wild-type or p.G12V probe positive cells in cancer cell lines.

| Cell line | mutation status of <i>KRAS</i>  | RNA based in situ hybridization analysis |             |                       |                    |
|-----------|---------------------------------|------------------------------------------|-------------|-----------------------|--------------------|
|           |                                 | <i>dapB</i>                              | <i>PPIB</i> | <i>KRAS</i> wild-type | <i>KRAS</i> p.G12V |
| HT29      | wild-type                       | 0/840                                    | 881/881     | 835/854               | 0/739              |
|           |                                 | (0.0)                                    | (100.0)     | (97.7)                | (0.0)              |
| SW620     | <i>KRAS</i> p.G12V homozygous   | 0/1340                                   | 1411/1411   | 0/1359                | 641/1701           |
|           |                                 | (0.0)                                    | (100.0)     | (0.0)                 | (37.2)             |
| SKOV3     | wild-type                       | 0/716                                    | 741/741     | 695/711               | 0/1123             |
|           |                                 | (0.0)                                    | (100.0)     | (97.6)                | (0.0)              |
| SW626     | <i>KRAS</i> p.G12V heterozygous | 0/620                                    | 564/567     | 372/526               | 122/550            |
|           |                                 | (0.0)                                    | (99.4)      | (72.8)                | (22.3)             |
| OVCAR5    | <i>KRAS</i> p.G12V homozygous   | 0/595                                    | 710/710     | 0/689                 | 246/807            |
|           |                                 | (0.0)                                    | (100.0)     | (0.0)                 | (30.2)             |

positive cells / total counted cells(%)

Table S2. The proportion of *KRAS* wild-type or p.G12V probe positive cells positive cells in ovarian cancers.

| Case | histology    | <i>KRAS</i> p.G12V MAF (NGS) | RNA based in situ hybridization analysis |                     |                       |                    |
|------|--------------|------------------------------|------------------------------------------|---------------------|-----------------------|--------------------|
|      |              |                              | <i>dapB</i>                              | <i>PPIB</i>         | <i>KRAS</i> wild-type | <i>KRAS</i> p.G12V |
| OV1  | endometrioid | wild-type                    | 4/1672<br>(0.2)                          | 1648/1649<br>(99.9) | 719/1714<br>(41.9)    | 0/1665<br>(0.0)    |
| OV2  | clear        | wild-type                    | 3/1391<br>(0.2)                          | 1310/1312<br>(99.8) | 473/1311<br>(36.1)    | 0/1310<br>(0.0)    |
| OV3  | clear        | 0.36                         | 0/906<br>(0.0)                           | 857/888<br>(99.9)   | 354/856<br>(41.4)     | 150/841<br>(17.8)  |
| OV4  | clear        | 0.39                         | 0/918<br>(0.0)                           | 1215/1224<br>(99.3) | 247/946<br>(26.1)     | 78/880<br>(8.9)    |
| OV5  | clear        | 0.41                         | 1/967<br>(0.1)                           | 985/985<br>(100.0)  | 264/1103<br>(23.9)    | 85/1103<br>(7.7)   |
| OV6  | endometrioid | 0.44                         | 0/1505<br>(0)                            | 1498/1503<br>(99.7) | 453/1620<br>(28.0)    | 59/1481<br>(4.0)   |
| OV7  | endometrioid | 0.63                         | 1/1582<br>(0.0)                          | 1583/1589<br>(99.4) | 454/1597<br>(28.4)    | 190/1419<br>(13.4) |
| OV8  | clear        | 0.67                         | 0/940<br>(0.0)                           | 942/942<br>(100.0)  | 223/880<br>(25.3)     | 220/1064<br>(20.7) |
| OV9  | endometrioid | 0.7                          | 0/981<br>(0.0)                           | 947/947<br>(100.0)  | 12/966<br>(1.2)       | 331/958<br>(34.6)  |

positive cells / total counted cells(%)

Table S3. The proportion of *KRAS* wild-type or p.G12V probe positive cells in ovarian endometriosis.

| Case           | The way to collect samples | RNA based in situ hybridization analysis |                      |                       |                    | Expected<br>mutational status of <i>KRAS</i> |
|----------------|----------------------------|------------------------------------------|----------------------|-----------------------|--------------------|----------------------------------------------|
|                |                            | <i>dapB</i>                              | <i>PPIB</i>          | <i>KRAS</i> wild-type | <i>KRAS</i> p.G12V |                                              |
| ENDO_1_Red     | retrospective              | 0/578<br>(0.0)                           | 753/753<br>(100.0)   | 4/904<br>(0.4)        | 106/751<br>(14.1)  | <i>KRAS</i> p.G12V                           |
| ENDO_1_Yellow  | retrospective              | 0/455<br>(0.0)                           | 446/460<br>(97.0)    | 133/507<br>(26.2)     | 27/513<br>(5.3)    | <i>KRAS</i> p.G12V                           |
| ENDO_1_Green   | retrospective              | 0/161<br>(0.0)                           | 143/151<br>(94.7)    | 20/131<br>(15.3)      | 0/161<br>(0.0)     | no <i>KRAS</i> p.G12V                        |
| ENDO_2         | retrospective              | 0/458<br>(0.0)                           | 820/820<br>(100.0)   | 76/499<br>(15.2)      | 36/461<br>(7.8)    | <i>KRAS</i> p.G12V                           |
| ENDO_3         | retrospective              | 0/534<br>(0.0)                           | 590/590<br>(100.0)   | 26/403<br>(6.5)       | 23/468<br>(4.9)    | <i>KRAS</i> p.G12V                           |
| ENDO_4         | retrospective              | 0/535<br>(0.0)                           | 418/560<br>(74.6)    | 0/517<br>(0.0)        | 29/630<br>(4.6)    | <i>KRAS</i> p.G12V                           |
| ENDO_5         | retrospective              | 0/209<br>(0.0)                           | 225/246<br>(91.5)    | 40/216<br>(18.5)      | 0/204<br>(0.0)     | no <i>KRAS</i> p.G12V                        |
| ENDO_6         | retrospective              | 0/355<br>(0.0)                           | 370/408<br>(90.7)    | 15/348<br>(4.3)       | 0/367<br>(0.0)     | no <i>KRAS</i> p.G12V                        |
| ENDO_7         | prospective                | 0/501<br>(0.0)                           | 491/501<br>(98.0)    | 143/492<br>(29.1)     | 30/736<br>(4.1)    | <i>KRAS</i> p.G12V                           |
| ENDO_8         | prospective                | 1/981<br>(0.1)                           | 495/522<br>(94.8)    | 237/945<br>(25.1)     | 40/822<br>(4.9)    | <i>KRAS</i> p.G12V                           |
| ENDO_9         | prospective                | 1/999<br>(0.1)                           | 206/210<br>(98.1)    | 101/973<br>(10.4)     | 79/878<br>(9.0)    | <i>KRAS</i> p.G12V                           |
| ENDO_10        | prospective                | 0/504<br>(0.0)                           | 492/506<br>(97.2)    | 8/520<br>(1.5)        | 76/491<br>(15.5)   | <i>KRAS</i> p.G12V                           |
| ENDO_11_Red    | prospective                | 0/522<br>(0.0)                           | 499/512<br>(97.5)    | 6/452<br>(1.4)        | 92/463<br>(19.9)   | <i>KRAS</i> p.G12V                           |
| ENDO_11_Yellow | prospective                | 0/167<br>(0.0)                           | 206/210<br>(98.1)    | 40/161<br>(24.8)      | 21/163<br>(12.9)   | <i>KRAS</i> p.G12V                           |
| ENDO_11_Green  | prospective                | 0/146<br>(0.0)                           | 153/153<br>(100.0)   | 66/155<br>(42.6)      | 0/137<br>(0.0)     | no <i>KRAS</i> p.G12V                        |
| ENDO_12        | prospective                | 0/1210<br>(0.0)                          | 1202/1202<br>(100.0) | 618/1358<br>(45.5)    | 242/1163<br>(20.8) | <i>KRAS</i> p.G12V                           |
| ENDO_13        | prospective                | 0/260<br>(0.0)                           | 258/261<br>(98.9)    | 8/264<br>(3.0)        | 0/323<br>(0.0)     | no <i>KRAS</i> p.G12V                        |
| ENDO_14        | prospective                | 0/215<br>(0.0)                           | 202/202<br>(100.0)   | 32/195<br>(16.4)      | 0/222<br>(0.0)     | no <i>KRAS</i> p.G12V                        |
| ENDO_15        | prospective                | 0/690<br>(0.0)                           | 715/715<br>(100.0)   | 164/708<br>(23.2)     | 0/669<br>(0.0)     | no <i>KRAS</i> p.G12V                        |
| ENDO_16        | prospective                | 0/230<br>(0.0)                           | 232/240<br>(96.7)    | 72/275<br>(26.2)      | 0/279<br>(0.0)     | no <i>KRAS</i> p.G12V                        |
| ENDO_17        | prospective                | 0/325<br>(0.0)                           | 331/331<br>(100.0)   | 96/367<br>(26.2)      | 0/340<br>(0.0)     | no <i>KRAS</i> p.G12V                        |
| ENDO_18        | prospective                | 0/206<br>(0.0)                           | 205/213<br>(96.2)    | 56/212<br>(26.4)      | 0/203<br>(0.0)     | no <i>KRAS</i> p.G12V                        |
| ENDO_19        | prospective                | 0/440<br>(0.0)                           | 610/610<br>(100.0)   | 124/456<br>(27.2)     | 0/407<br>(0.0)     | no <i>KRAS</i> p.G12V                        |
| ENDO_20        | prospective                | 0/214<br>(0.0)                           | 200/200<br>(100.0)   | 76/260<br>(29.2)      | 0/249<br>(0.0)     | no <i>KRAS</i> p.G12V                        |
| ENDO_21        | prospective                | 1/470<br>(0.2)                           | 400/410<br>(97.6)    | 197/619<br>(31.8)     | 0/413<br>(0.0)     | no <i>KRAS</i> p.G12V                        |
| ENDO_22        | prospective                | 0/329<br>(0.0)                           | 430/430<br>(100.0)   | 127/393<br>(32.3)     | 0/423<br>(0.0)     | no <i>KRAS</i> p.G12V                        |
| ENDO_23        | prospective                | 0/553<br>(0.0)                           | 586/586<br>(100.0)   | 196/568<br>(34.5)     | 0/389<br>(0.0)     | no <i>KRAS</i> p.G12V                        |
| ENDO_24        | prospective                | 0/695<br>(0.0)                           | 233/233<br>(100.0)   | 267/741<br>(36.0)     | 0/729<br>(0.0)     | no <i>KRAS</i> p.G12V                        |
| ENDO_25        | prospective                | 0/325<br>(0.0)                           | 298/310<br>(96.1)    | 154/364<br>(42.3)     | 0/350<br>(0.0)     | no <i>KRAS</i> p.G12V                        |
| ENDO_26        | prospective                | 0/578<br>(0.0)                           | 466/466<br>(100.0)   | 265/618<br>(42.9)     | 0/577<br>(0.0)     | no <i>KRAS</i> p.G12V                        |

positive cells / total counted cells(%)

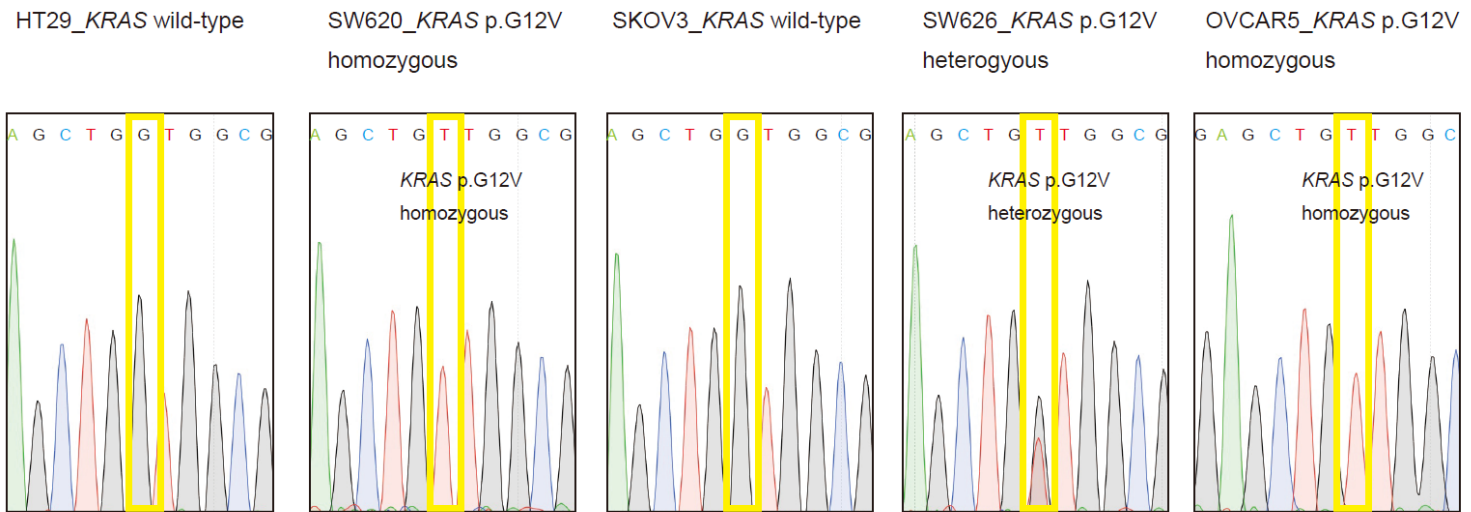

**Figure S1. The chromatogram of Sanger sequencing for *KRAS* mutation**  
*KRAS* mutation status was validated in cell blocks by Sanger sequencing.

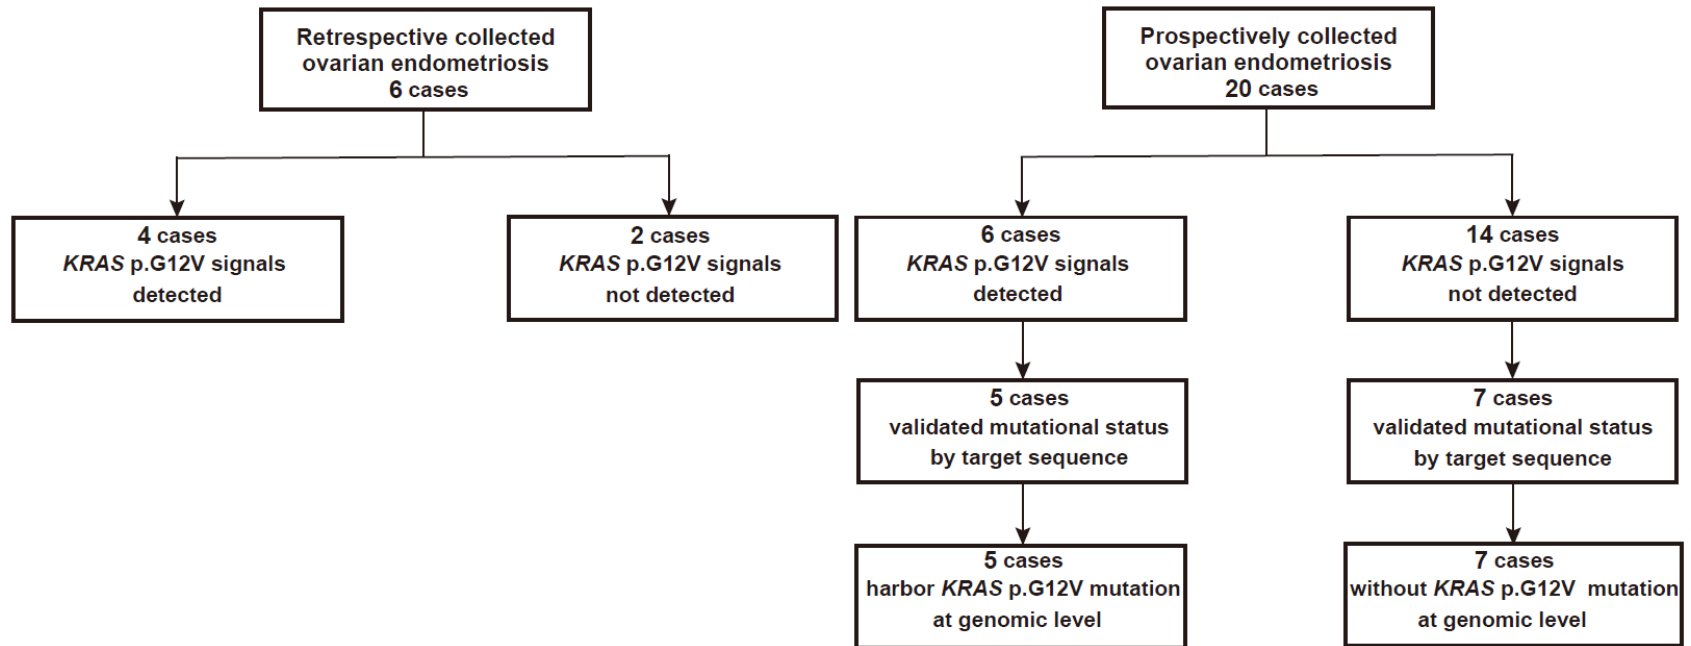

**Figure S2. The analysis flowchart of ovarian endometriosis cases in this study.**

Six retrospectively collected cases and 20 prospectively collected cases were recruited in this study.

KRAS p.G12V probe

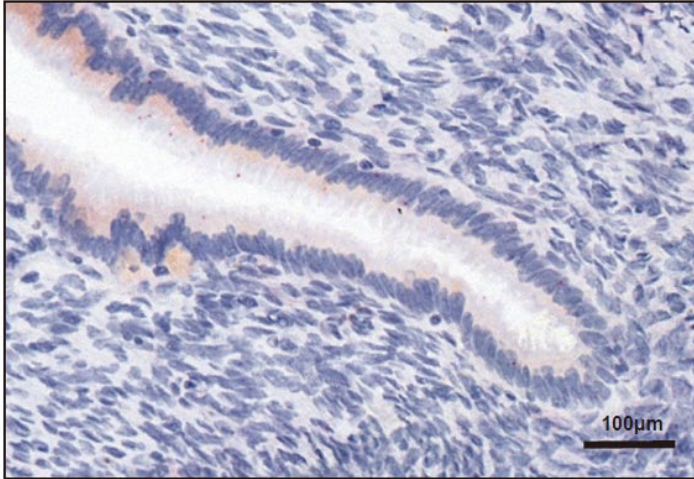

Laser- microdissection

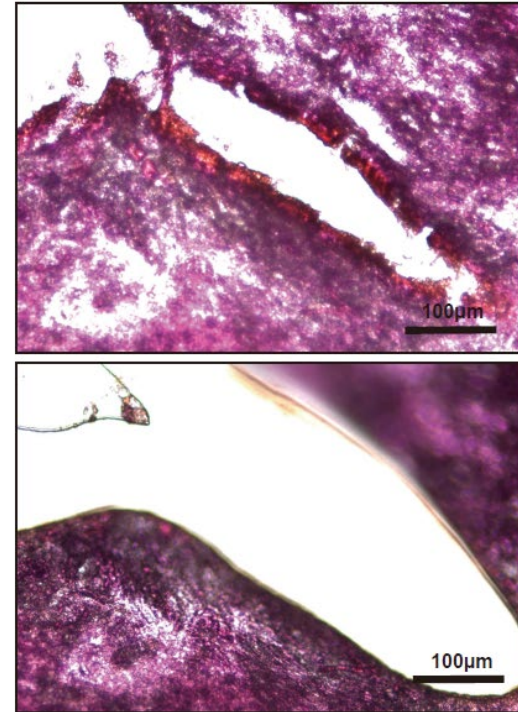

**Figure S3. Laser microdissection of ovarian endometriotic epithelial cells for validation of mutational status.**

To validate the *KRAS* mutational status in ovarian endometriosis, we performed laser microdissection of endometriotic epithelial cells and target gene sequencing for 12 available cases.

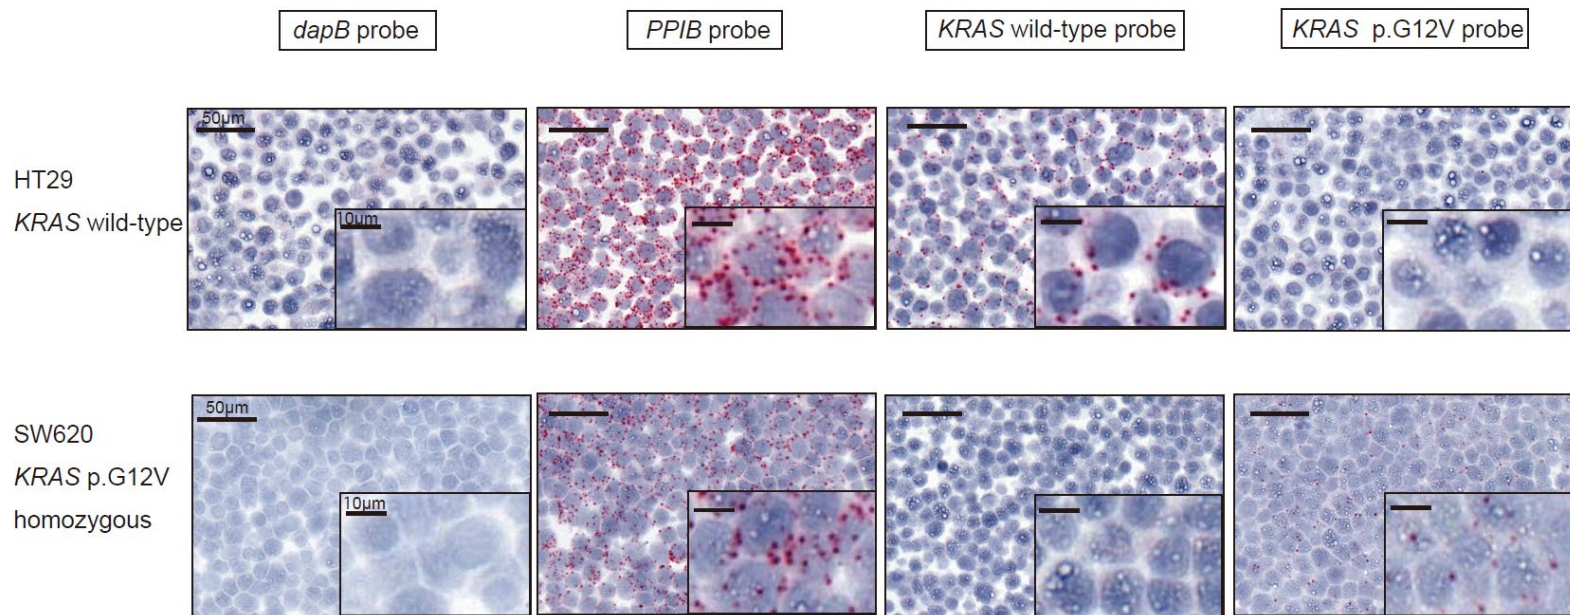

**Figure S4. RNA-based in situ hybridization assay in colorectal cancer cell lines.**

Representative images of validation of the *KRAS* p.G12V probe sets for colorectal cancer cell lines (a wild-type cell line and a homozygous mutant cell line) using a negative control probe (*dapB*), a positive control probe (*PPIB*), the wild-type probe and the mutant probe are shown. Probe binding is visualized as punctate red dots.



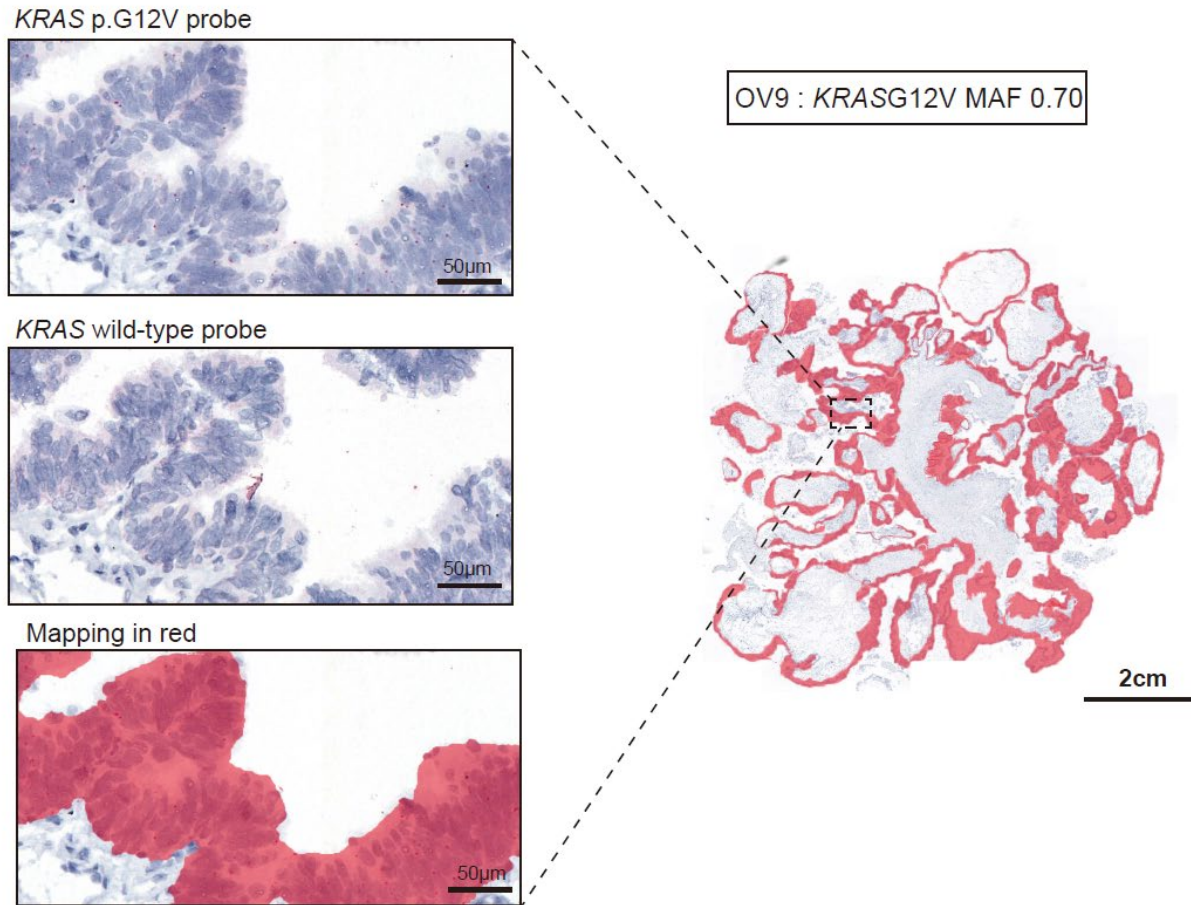

**Figure S5. The spatial distribution of mutation signals in ovarian cancer.**

Whole images of *KRAS* p.G12V and wild-type probe signals in one ovarian cancer sample (OV9) are displayed. The area of endometriotic epithelial cells with predominant mutational signals is mapped in red.

Ovarian endometrioid carcinoma (*KRAS* p.G12D MAF 0.93)

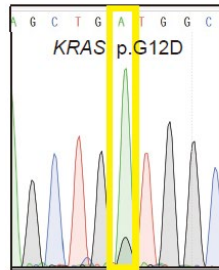

*KRAS* p.G12V probe

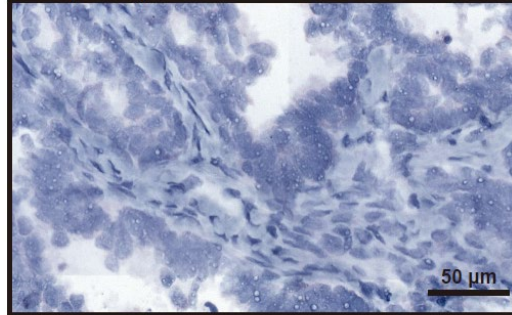

*KRAS* wild-type probe

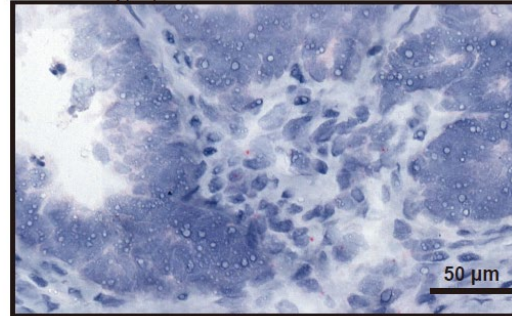

**Figure S6. No cross-reactivity of the *KRAS* p.G12V probe with other *KRAS* mutations.**

To confirm a lack of cross-reactivity of *KRAS* p.G12V probe with other *KRAS* mutations, we performed this assay for one ovarian cancer sample harboring the *KRAS* p.G12D mutation with a high MAF (0.93) but not the *KRAS* p.G12V mutation. No *KRAS* p.G12V mutation signal was observed in the *KRAS* p.G12D-mutated ovarian cancer sample.

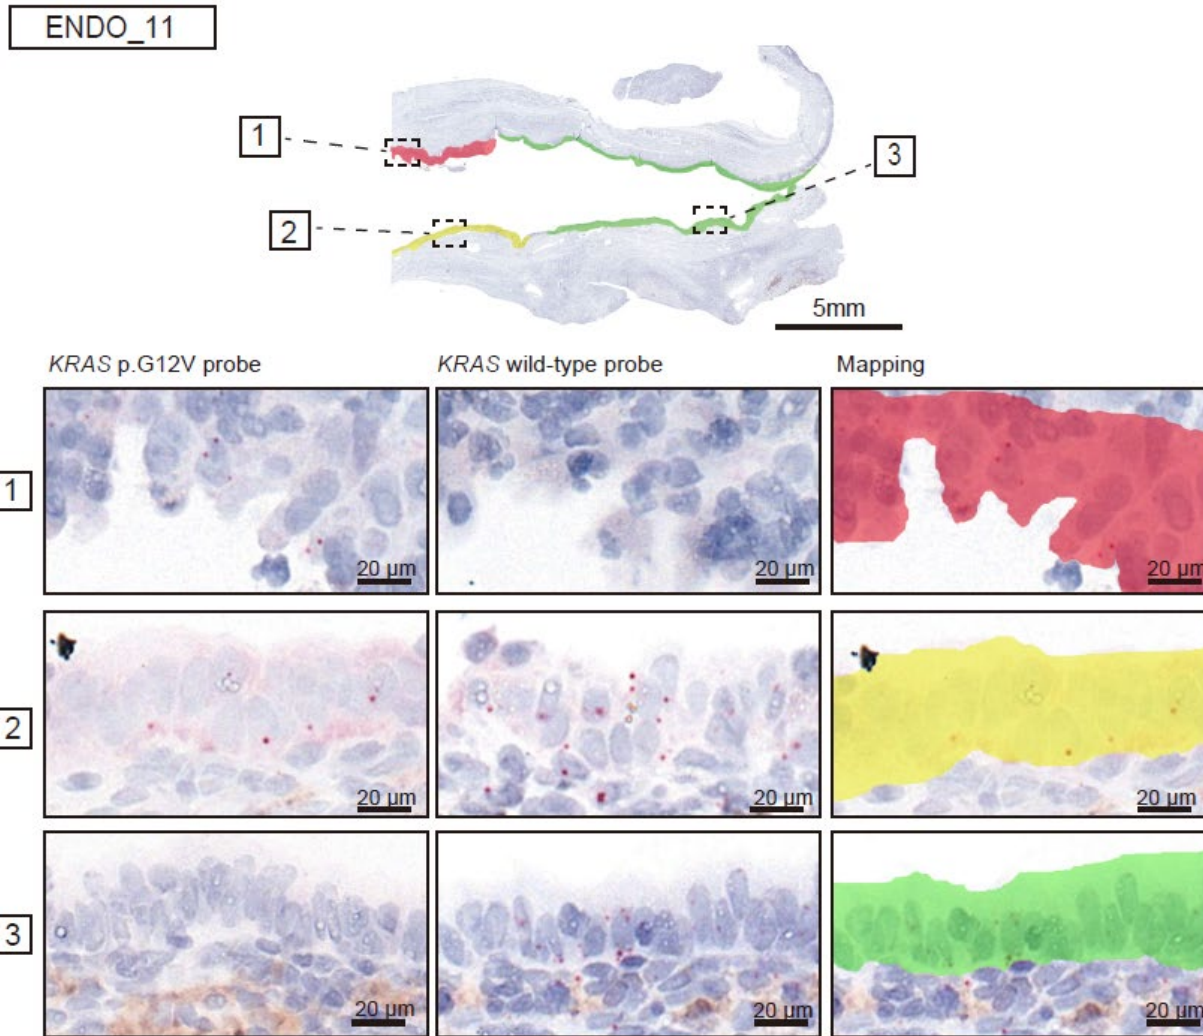

**Figure S7.** Intratumor heterogeneity of *KRAS* p.G12V mRNA expression and the topographical map in ENDO\_11.

1 The red region

2 The yellow region

3 The green region

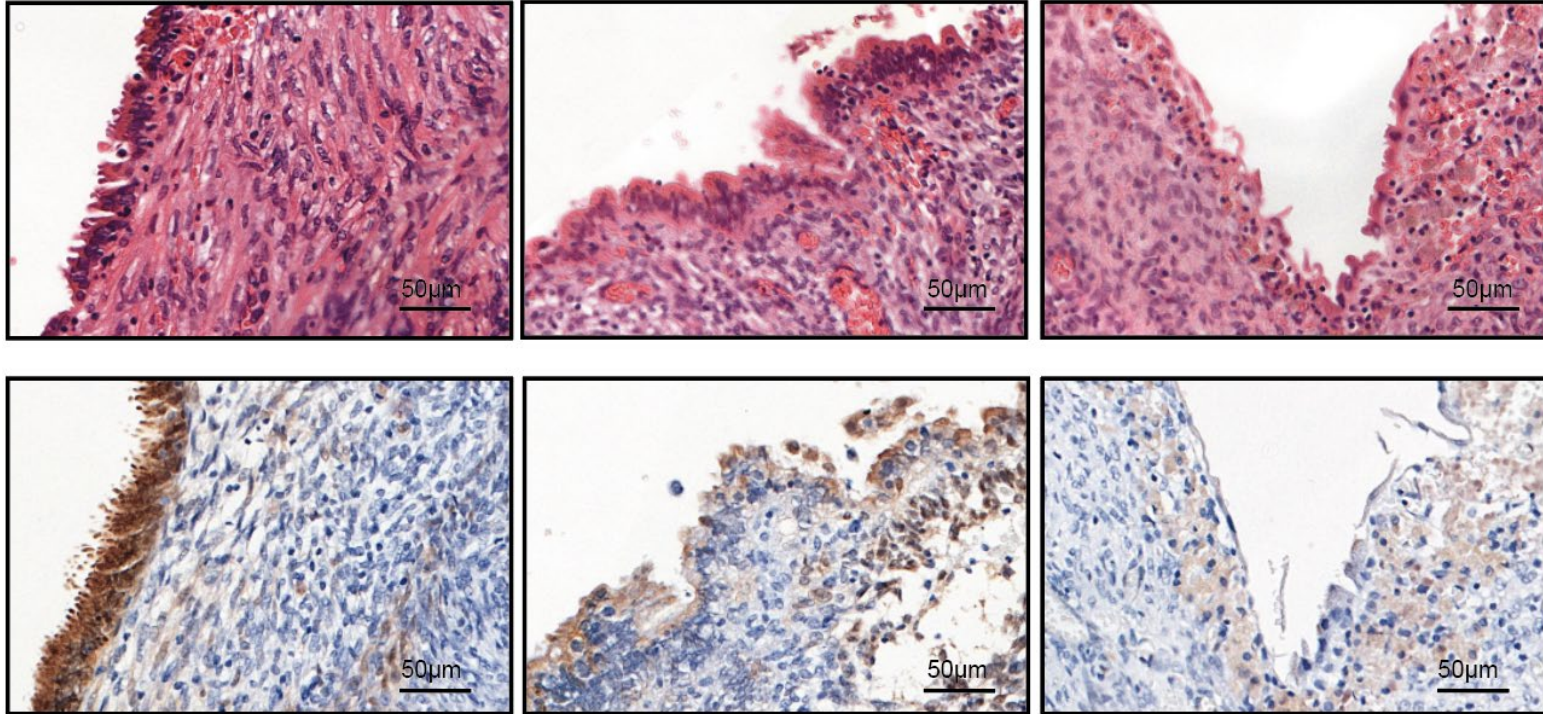

**Figure S8. The result of immunohistochemical analysis for p-ERK expression in an ovarian endometriosis case (ENDO\_1) with intratumor heterogeneity of *KRAS* p.G12V mRNA expression.** Immunohistochemical analysis for p-ERK was performed on serial sections from in situ hybridization assay slides (ENDO\_1). The staining intensity for p-ERK was strong in the red region, moderate in the yellow region, and low in the green region on the same slide.

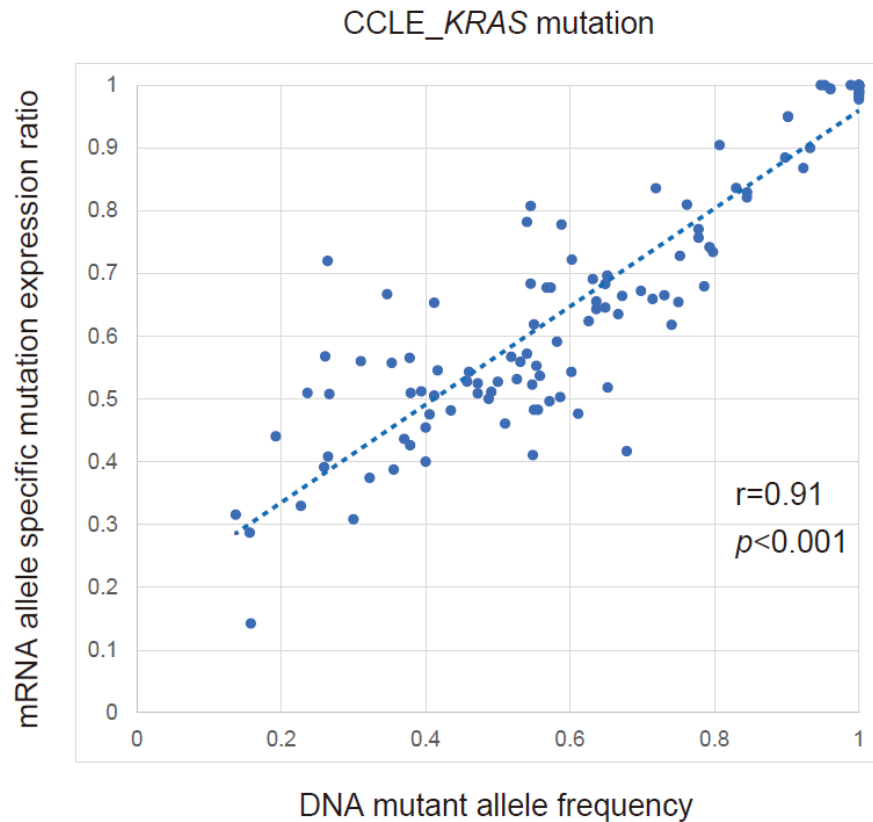

**Figure S9. Correlation between *KRAS* mutant allele expression based on RNA sequencing and mutant allele frequency by DNA sequencing in human cancer cell lines.**

Sequencing data of human cancer cell lines with *KRAS* mutations were downloaded from the Cancer Cell Line Encyclopedia (CCLE) portal. The mRNA allele-specific mutation expression ratio (the number of mutation reads divided by the total number of reads) correlated significantly positively with the mutant allele frequency.

A)

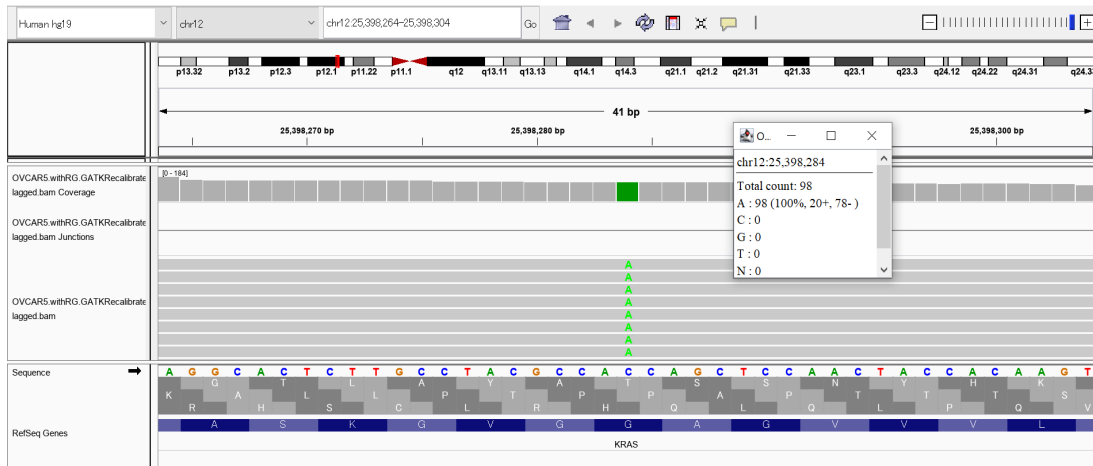

B)

|        | MAF (NGS)    | <i>dapB</i>    | <i>PPIB</i>         | <i>KRAS</i> Wild-type | <i>KRAS</i> p.G12V | RNA_seq_ref (C)* | RNA_seq_alt (A)* |
|--------|--------------|----------------|---------------------|-----------------------|--------------------|------------------|------------------|
| SKOV3  | wild-type    | 0/716<br>(0)   | 741/741<br>(100)    | 695/711<br>(97.6)     | 0/1123<br>(0)      | 97               | 0                |
| SW626  | heterozygous | 0/620<br>(0)   | 564/567<br>(99.4)   | 372/526<br>(72.8)     | 122/550<br>(22.3)  | 48               | 60               |
| OVCAR5 | homozygous   | 0/595<br>(0)   | 710/710<br>(100)    | 0/689<br>(0)          | 246/807<br>(30.2)  | 0                | 98               |
| OV3    | 0.36         | 0/906<br>(0)   | 857/888<br>(99.9)   | 354/856<br>(41.4)     | 150/841<br>(17.8)  | 41               | 31               |
| OV4    | 0.39         | 0/918<br>(0)   | 1215/1224<br>(99.3) | 247/946<br>(26.1)     | 78/880<br>(8.9)    | 29               | 14               |
| OV5    | 0.41         | 1/967<br>(0.1) | 985/985<br>(100)    | 264/1103<br>(23.9)    | 85/1103<br>(7.7)   | 28               | 38               |
| OV8    | 0.67         | 0/940<br>(0)   | 942/942<br>(100)    | 223/880<br>(25.3)     | 220/1064<br>(20.7) | 5                | 17               |
| OV9    | 0.7          | 0/981<br>(0)   | 947/947<br>(100)    | 1/966<br>(0.1)        | 331/958<br>(34.6)  | 3                | 32               |

\* The number of reads

**Figure S10. *KRAS* wild-type or mutant allele expression in cell lines and ovarian cancer samples was visualized by integrated genome viewers (IGV)**

- A) OVCAR5 which harbor *KRAS* p.G12V homozygous mutation has only mutant allele reads.  
 B) Wild-type or mutant allele expression at *KRAS* codon number 35 was confirmed in three ovarian cancer cell lines and five ovarian cancer.

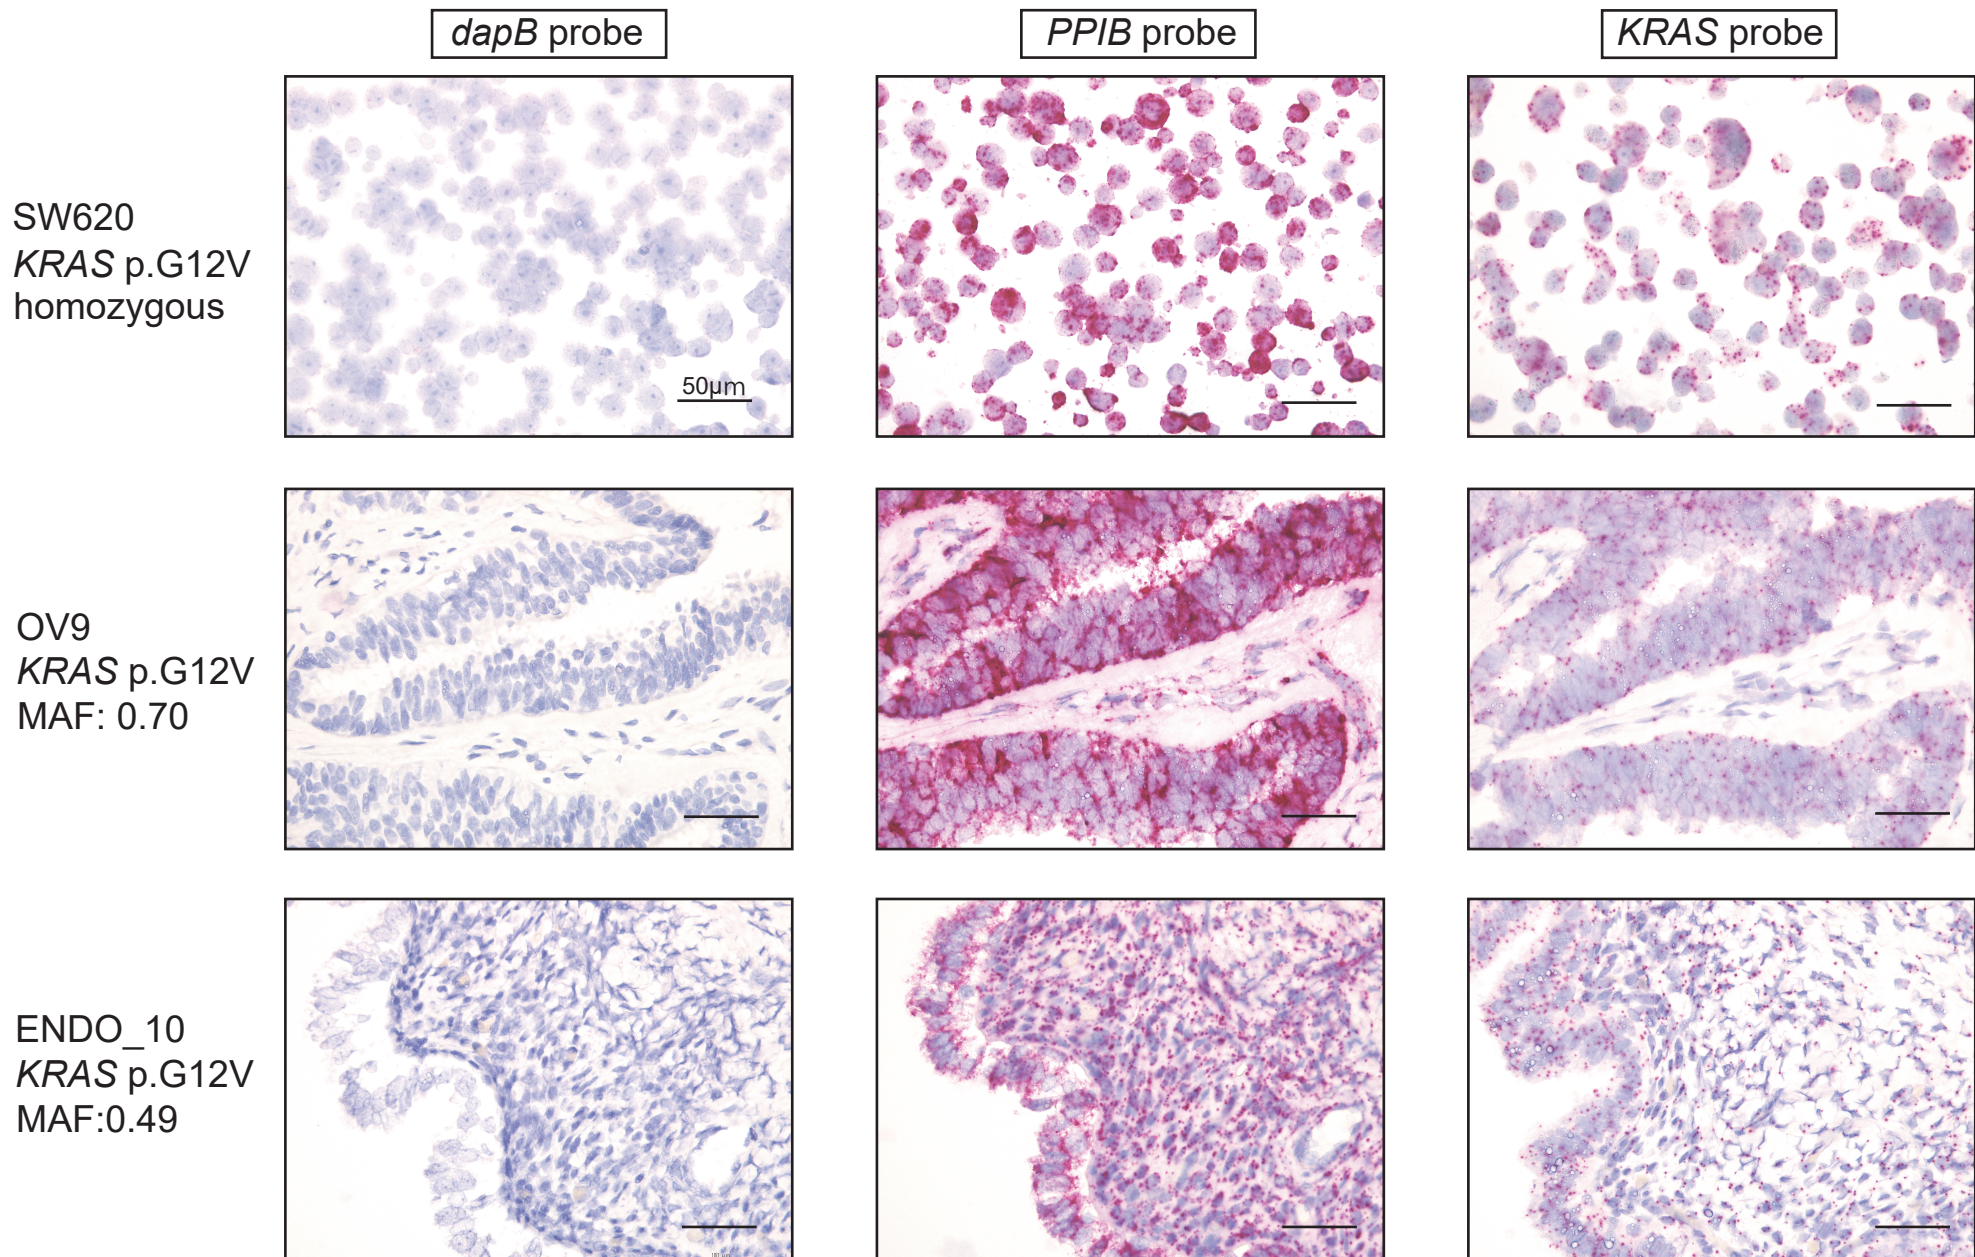

**Figure S11. *KRAS* mRNA expression based on BaseScope™ assay was validated by RNAscope® assay in FFPE samples**

Representative images of a validation of *KRAS* mRNA expression in SW620, OV9 and ENDO\_10 using the negative control probe, the positive control probe and *KRAS* probe are shown. Probe binding is visualized as punctate red dots.

*KRAS* p.G12V overexpression vs control  
in human mammary epithelial cells (GSE83083)

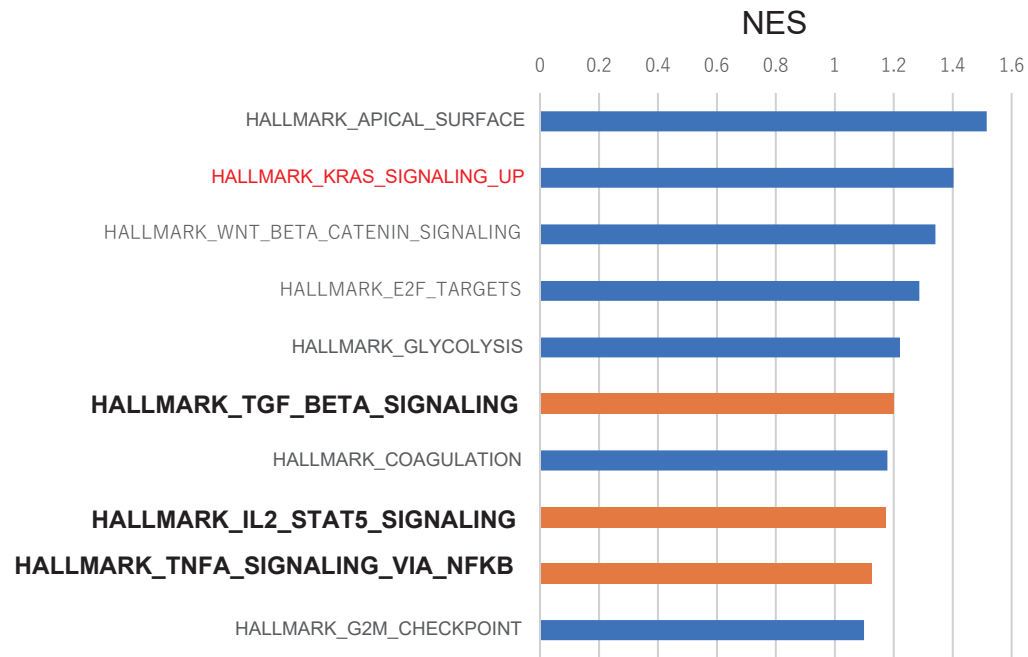

Enrichment plot: HALLMARK\_IL2\_STAT5\_SIGNALING (GSE83083)

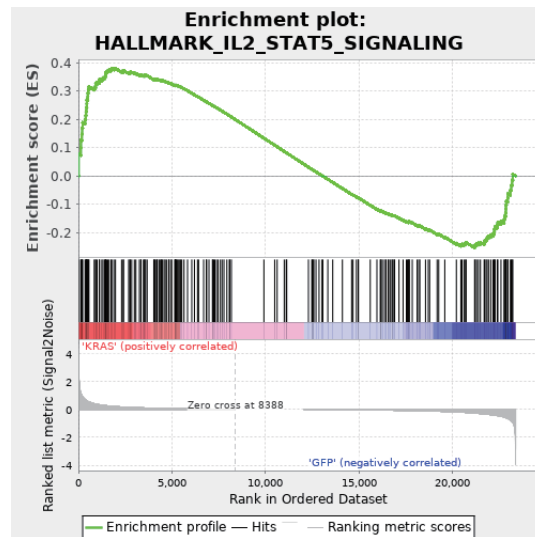

*KRAS* p. G12D transfection vs control  
in human pancreatic ductal epithelial cells (GSE58055)

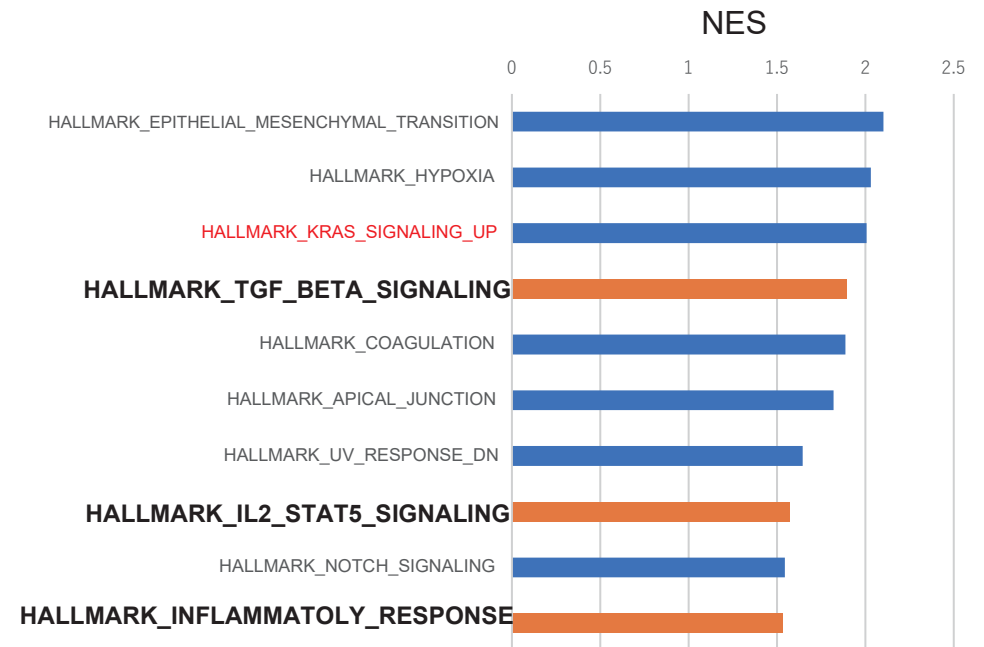

Enrichment plot: HALLMARK\_IL2\_STAT5\_SIGNALING (GSE58055)

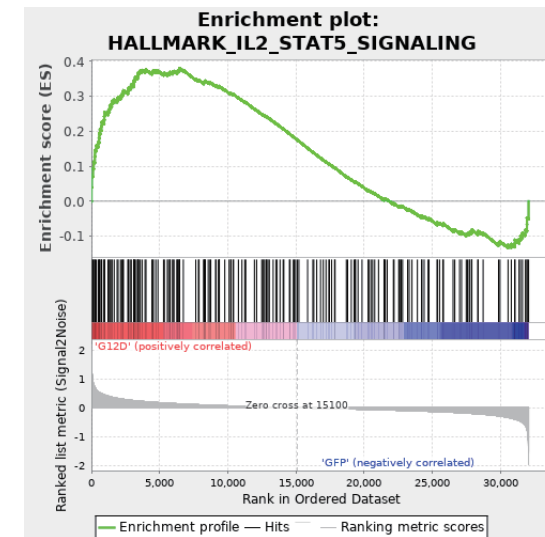

**Figure S12. Top 10 pathways of differentially expressed genes enriched in *KRAS*-mutant overexpressed**

Gene set enrichment analysis (GSEA) was performed by using publicly available data of *KRAS* p.G12V overexpressed human mammary epithelial cells (GSEA83083) and *KRAS* p.G12D transfected human pancreatic ductal epithelial cells (GSE58055).
